# Supplementary material for: Synthesis and structural and magnetic characterisation of tetranuclear Cu(ii) complexes possessing novel [Cu4(μ4-PO4)2(μ2-CO3)] butterfly cores that exhibit supramolecular isomerism
Source: Royal Society of Chemistry journal article supplement (doi:10.1039/b309275e), 2003-01-01

**Synthesis and structural and magnetic characterisation of tetranuclear Cu(II) complexes possessing novel [Cu4(4-PO4)2(2-CO3)] butterfly cores that exhibit supramolecular isomerism**

Robert P. Doyle,*a* PaulE. Kruger**a*, Keith S. Murray*b*, Boujemaa Moubarakib and Mark Nieuwenhuyzen*c*

a Department of Chemistry, Trinity College, Dublin 2, Ireland. E-mail: [**paul.kruger@tcd.ie**](mailto:paul.kruger@tcd.ie)

b School of Chemistry, Monash University, PO Box 23, Clayton, Victoria 3800, Australia.

c School of Chemistry, The Queen’s University of Belfast, Belfast, UK, BT9 5AG.

**Electronic Supporting Information**

**Page 2: Fig S1.** Selected views of the 3D H-bonded water network that encapsulates **1** showing oxygen-oxygen close contacts. Hydrogen atoms omitted for clarity.

**Page 3: Fig S2.** Selected views of the 2D H-bonded water network that encapsulates **1a** showing oxygen-oxygen close contacts. Hydrogen atoms omitted for clarity.

**Page 4: Fig S3**. Selected views of the 3D H-bonded water network that encapsulates **2** showing oxygen-oxygen close contacts. Hydrogen atoms omitted for clarity.

**Fig S1.** Selected views of the 3D H-bonded water network that encapsulates **1** showing oxygen-oxygen close contacts. Hydrogen atoms omitted for clarity.


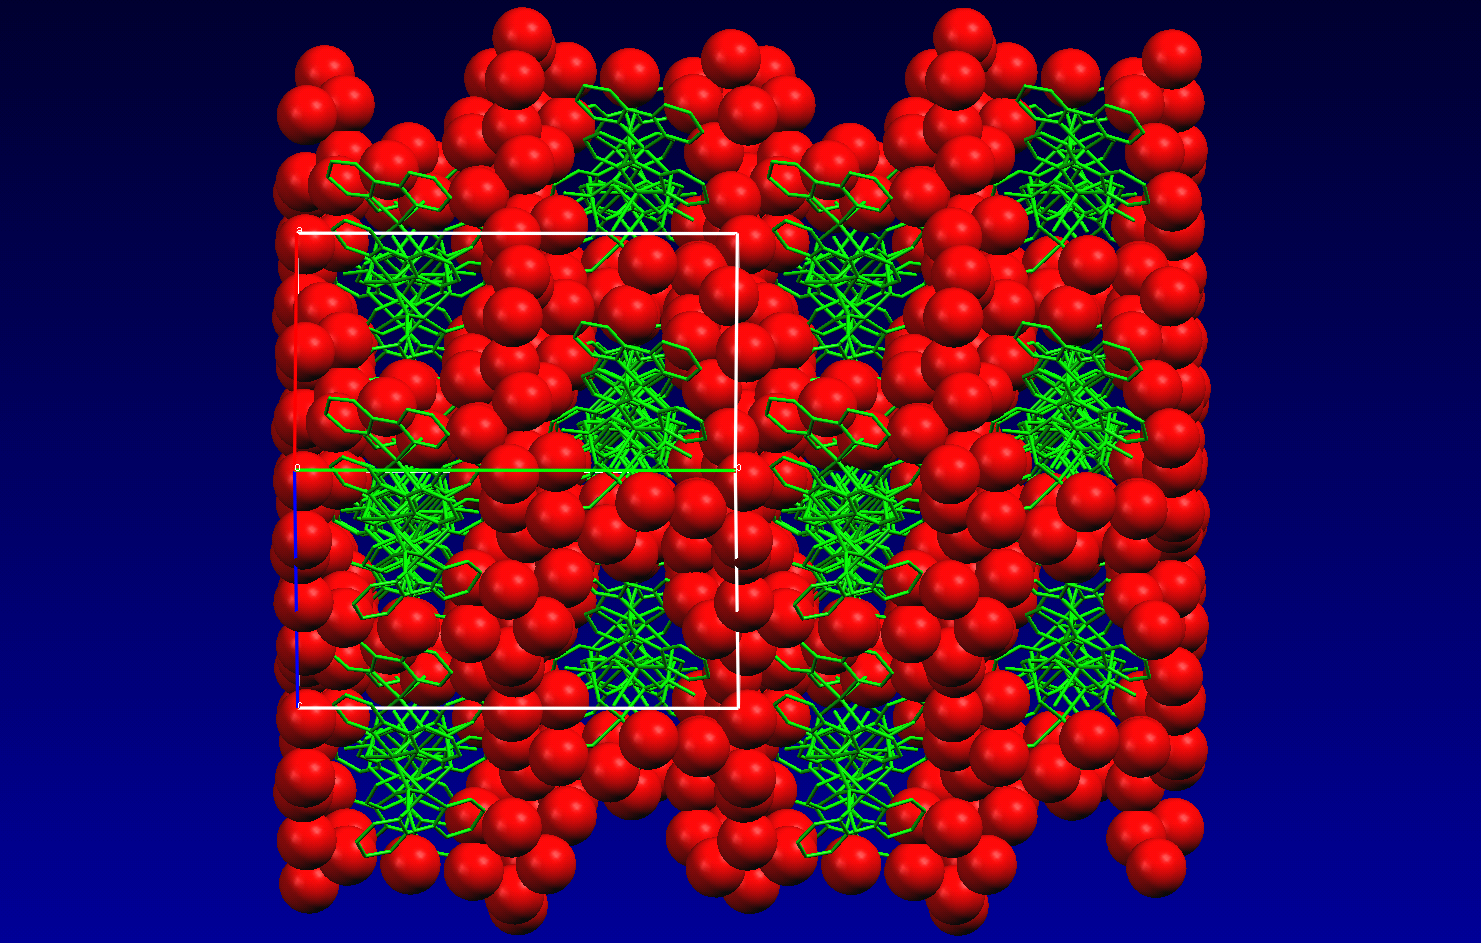


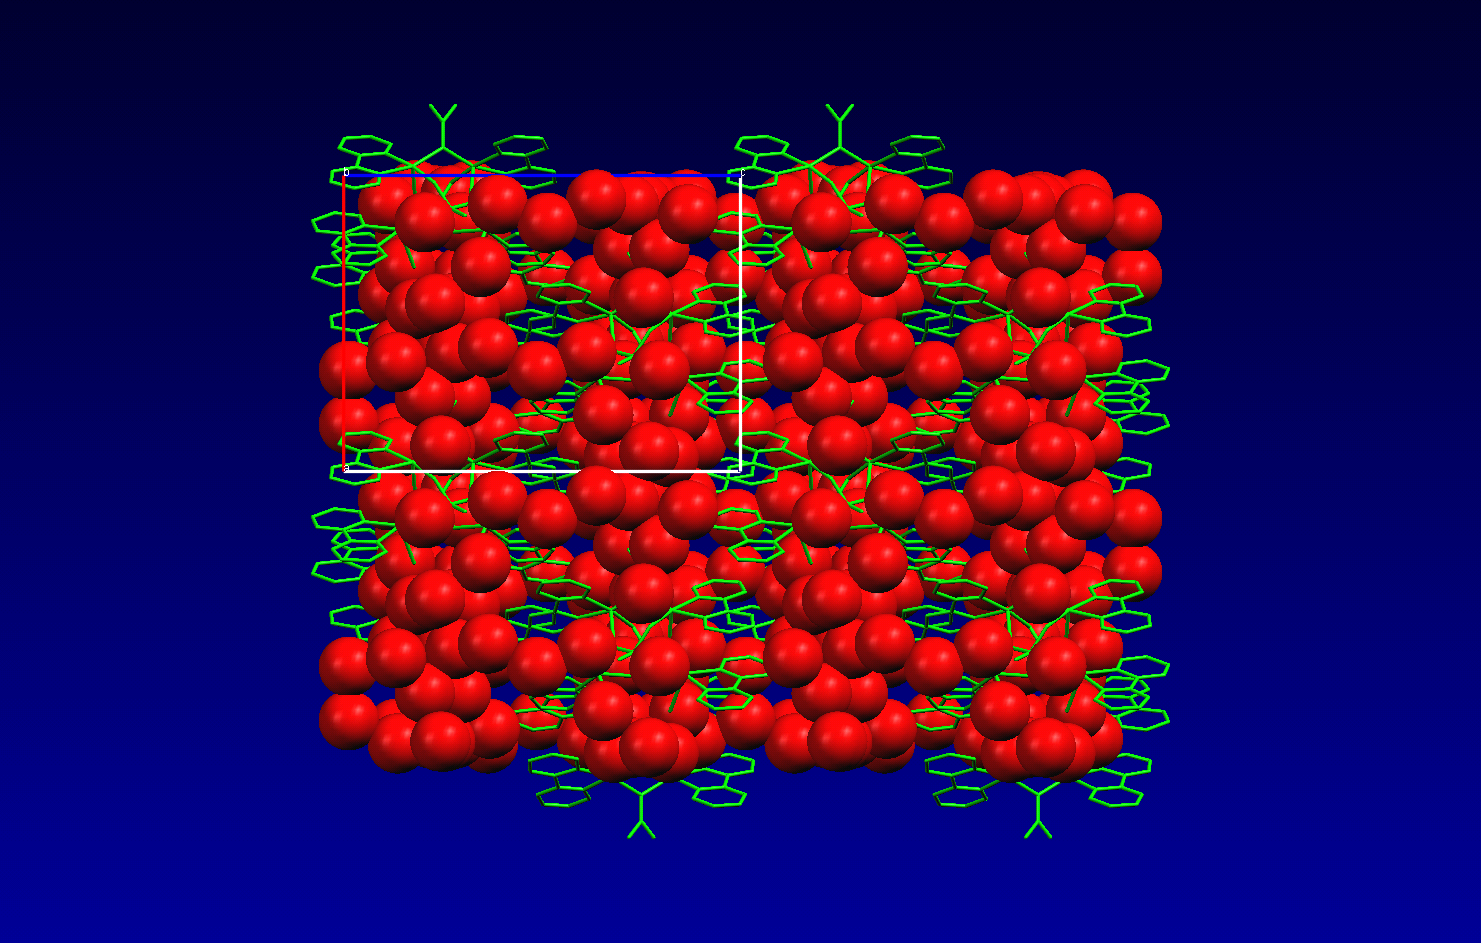


**Fig S2.** Selected views of the 2D H-bonded water network that encapsulates **1a** showing oxygen-oxygen close contacts. Hydrogen atoms omitted for clarity.


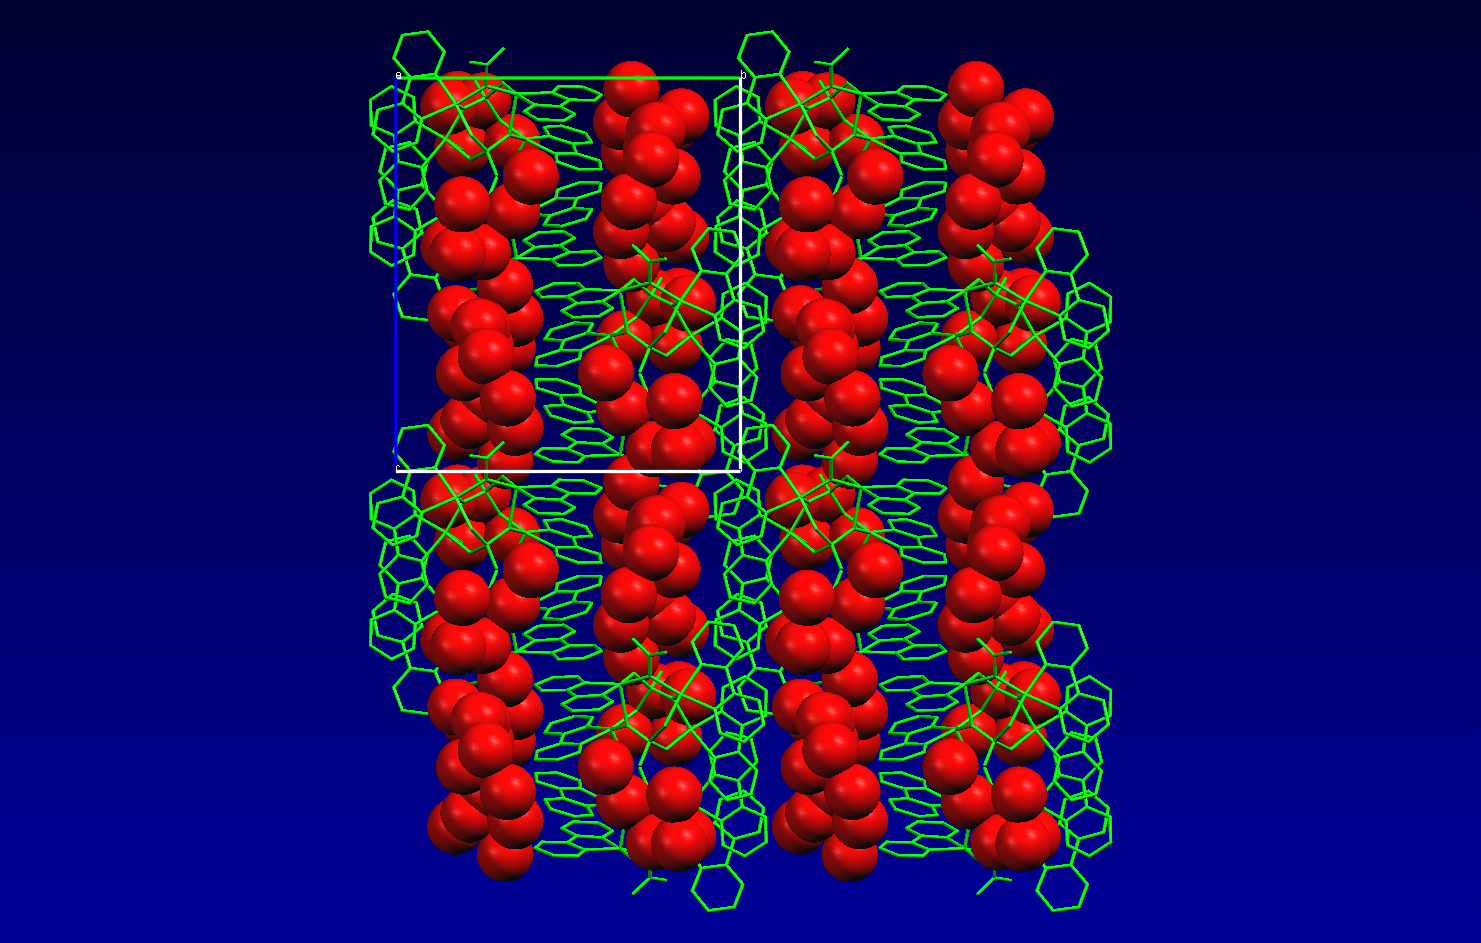


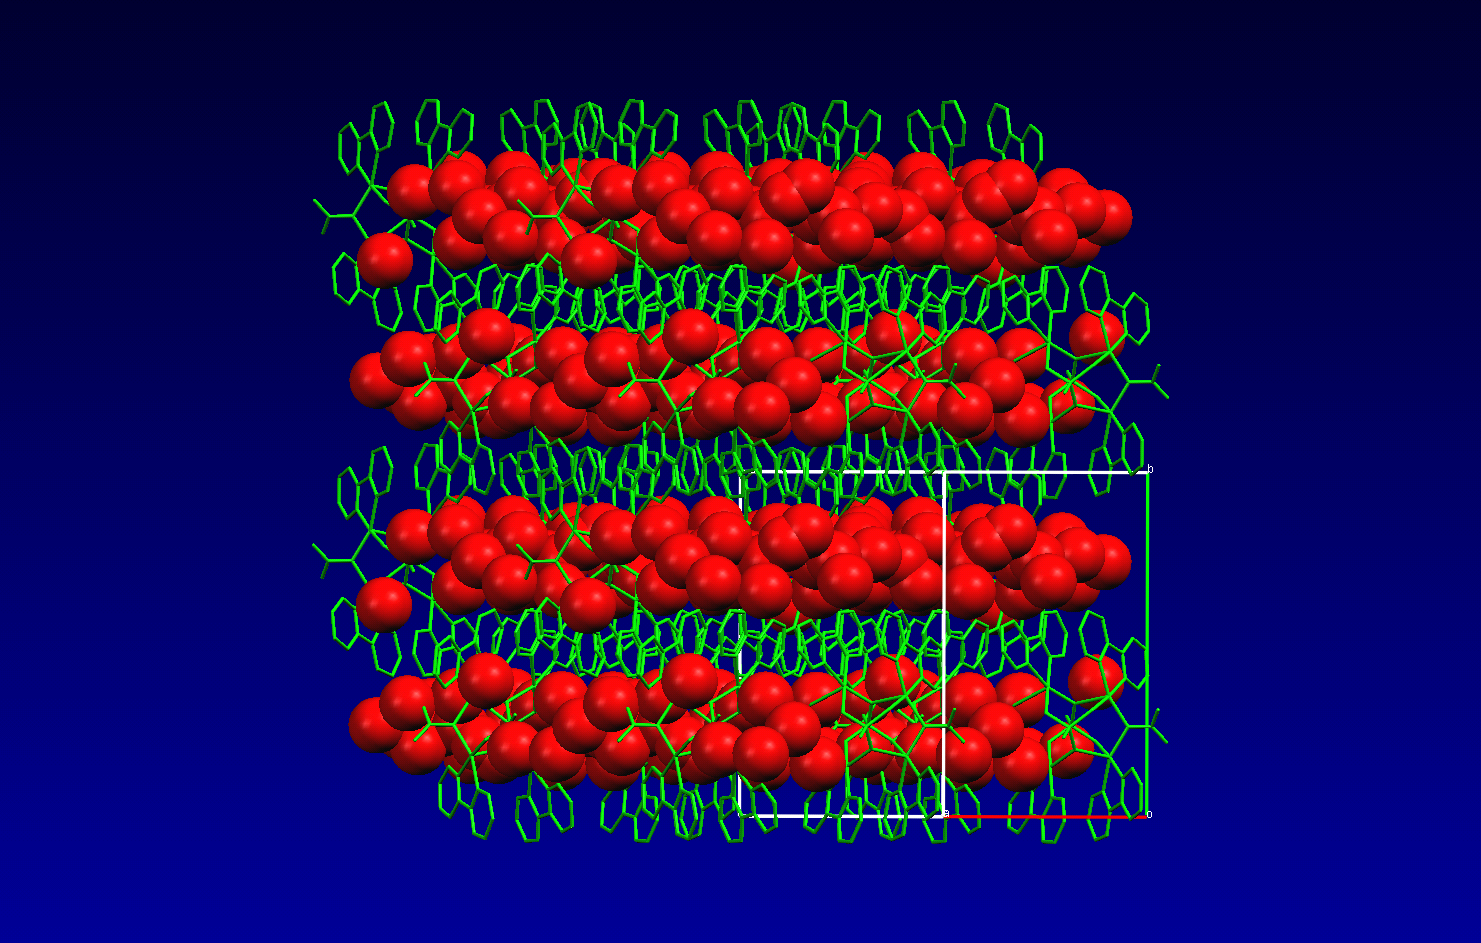


**Fig S3**. Selected views of the 3D H-bonded water network that encapsulates **2** showing oxygen-oxygen close contacts. Hydrogen atoms omitted for clarity.


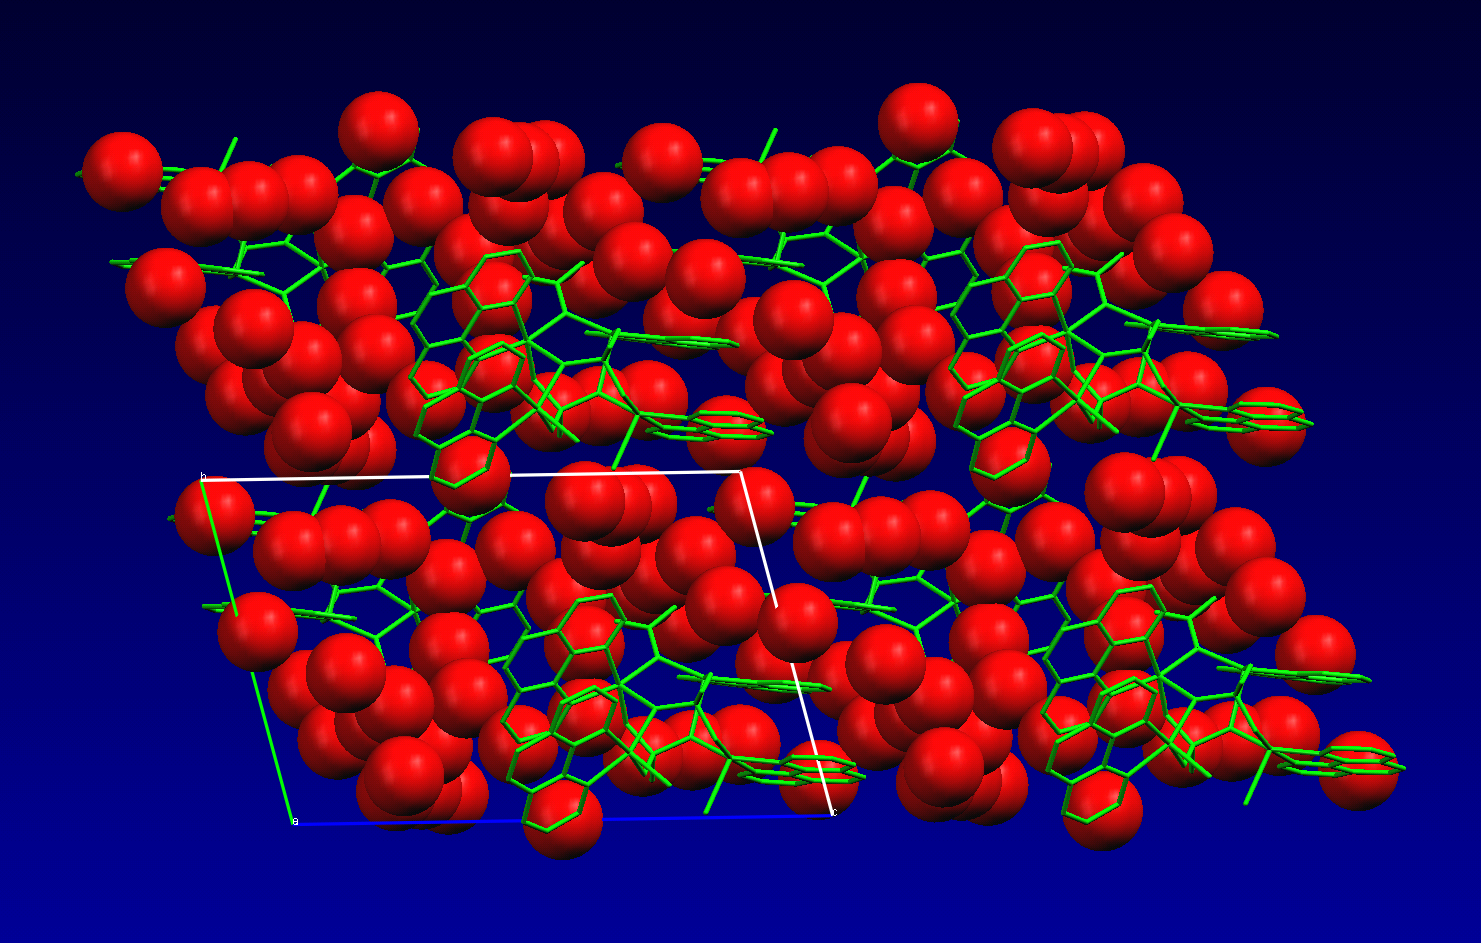


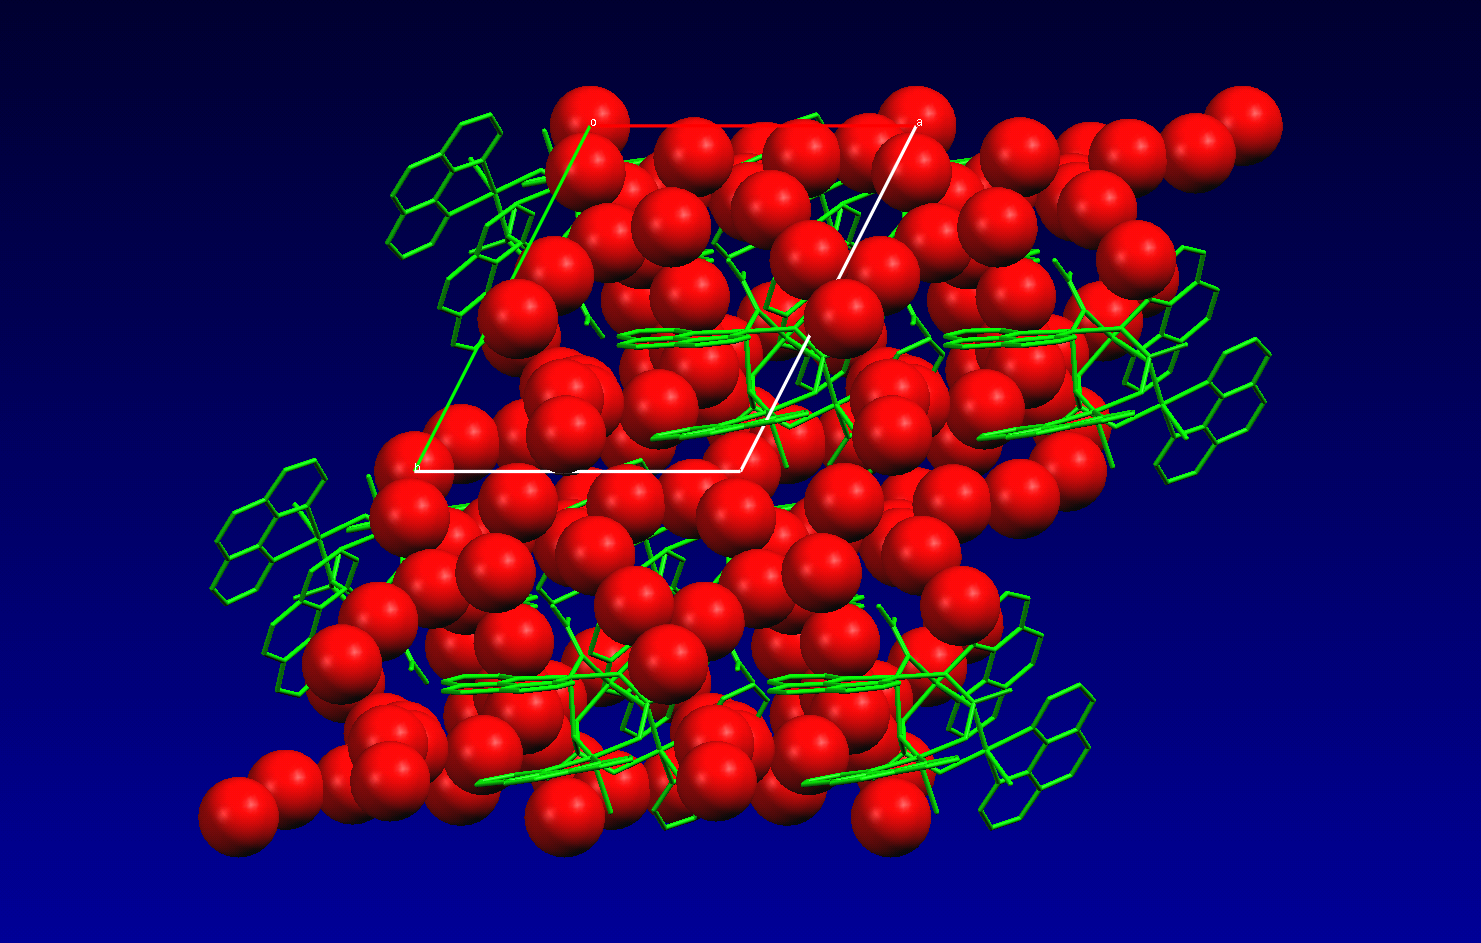

Supplement: b309275e.doc [file b309275e.doc]
